# Supplementary material for: Association of Meibomian Gland Dysfunction with Oral Statin Use
Source: MDPI journal article supplement (doi:10.3390/jcm11154632), 2022-08-08
Supplement: s1 [file s1]

**Supplementary Table S1.** Comparison of serum lipid profile values and clinical parameters by statin type

|                                            | <b>Atorvastatin</b><br><b>(n=16)</b> | <b>Rosuvastatin</b><br><b>(n=16)</b> | <b>Pitavastatin</b><br><b>(n=11)</b> | <i>p-value</i> |
|--------------------------------------------|--------------------------------------|--------------------------------------|--------------------------------------|----------------|
| <b>Total cholesterol</b><br><b>(mg/dL)</b> | 153.47 (38.92)                       | 151.75 (19.30)                       | 161.556 (25.075)                     | 0.439          |
| <b>LDL (mg/dL)</b>                         | 78.67 (34.18)                        | 71.75 (21.98)                        | 82.556 (21.477)                      | 0.468          |
| <b>Triglyceride (mg/dL)</b>                | 147.40 (80.43)                       | 113.00 (40.30)                       | 162.111 (97.257)                     | 0.475          |
| <b>HDL (mg/dL)</b>                         | 56.53 (11.26)                        | 65.33 (16.54)                        | 57.333 (9.552)                       | 0.164          |
| <b>SPEED</b>                               | 3.40 (3.18)                          | 5.33 (5.37)                          | 4.900 (5.405)                        | 0.760          |
| <b>TBUT (sec)</b>                          | 4.76 (2.23)                          | 5.85 (4.90)                          | 4.414 (1.985)                        | 0.832          |
| <b>Corneal stain</b>                       | 0.88 (1.26)                          | 1.38 (1.45)                          | 1.091 (1.300)                        | 0.532          |
| <b>Conjunctival stain</b>                  | 3.44 (2.76)                          | 3.25 (3.17)                          | 4.182 (4.513)                        | 0.918          |
| <b>MG expressibility</b>                   | 4.31 (2.24)                          | 3.25 (2.38)                          | 3.636 (3.295)                        | 0.387          |
| <b>MG quality</b>                          | 11.25 (4.67)                         | 12.69 (4.30)                         | 12.636 (7.298)                       | 0.687          |
| <b>TFL thickness(nm)</b>                   | 93.94 (9.43)                         | 75.57 (26.01)                        | 88.000 (15.240)                      | 0.164          |
| <b>Meiboscore</b>                          |                                      |                                      |                                      | 0.404          |
| Grade 0 (%)                                | 80.00                                | 84.62                                | 75                                   |                |
| Grade 1 (%)                                | 13.33                                | 15.38                                | 0                                    |                |
| Grade 2 (%)                                | 6.67                                 | 0.00                                 | 12.5                                 |                |
| Grade 3 (%)                                | 0.00                                 | 0.00                                 | 12.5                                 |                |

Values are presented as the mean (standard deviation) or number (%). LDL low-density lipoprotein, HDL high-density lipoprotein, SPEED Standard patient evaluation of eye dryness, TUBT tear film break-up time, MG meibomian gland, TFL tear film lipid layer. The bolds stand out for the “statistically significant”.

**Supplementary Table S2. (A)** Comparison of serum lipid profile values and clinical parameters according to atorvastatin dose **(B)** Comparison of serum lipid profile values and clinical parameters according to

rosuvastatin dose.

**Table S2(A)**

|                                  | Atorvastatin   |                 | <i>p-value</i> |
|----------------------------------|----------------|-----------------|----------------|
|                                  | 10mg           | 20mg            |                |
| <b>Total cholesterol (mg/dL)</b> | 155.42 (41.05) | 145.67 (34.93)  | 0.470          |
| <b>LDL (mg/dL)</b>               | 80.50 (37.43)  | 71.33 (19.30)   | 0.885          |
| <b>Triglyceride (mg/dL)</b>      | 146.50 (65.12) | 151.00 (148.09) | 0.564          |
| <b>HDL (mg/dL)</b>               | 56.67 (12.17)  | 56.00 (8.54)    | 0.942          |
| <b>SPEED</b>                     | 2.83 (3.21)    | 5.67 (2.08)     | 0.160          |
| <b>TBUT (sec)</b>                | 4.66 (2.47)    | 5.20 (0.36)     | 0.459          |
| <b>Corneal stain</b>             | 1.08 (1.32)    | 0.00 (0.00)     | 0.118          |
| <b>Conjunctival stain</b>        | 3.62 (2.90)    | 2.67 (2.31)     | 0.838          |
| <b>MG expressibility</b>         | 4.46 (2.44)    | 3.67 (1.15)     | 0.337          |
| <b>MG quality</b>                | 10.77 (4.73)   | 13.33 (4.62)    | 0.491          |
| <b>TFL thickness(nm)</b>         | 93.46 (10.10)  | 96.00 (6.93)    | 0.757          |
| <b>Meiboscore</b>                |                |                 | 0.519          |
| Grade 0 (%)                      | 83.33          | 66.67           |                |
| Grade 1 (%)                      | 8.33           | 33.33           |                |
| Grade 2 (%)                      | 8.33           | 0.00            |                |
| Grade 3 (%)                      | 0.00           | 0.00            |                |

**Table S2(B)**

|  | Rosuvastatin |      | <i>p-value</i> |
|--|--------------|------|----------------|
|  | 5mg          | 10mg |                |

|                                  |                |                |       |
|----------------------------------|----------------|----------------|-------|
| <b>Total cholesterol (mg/dL)</b> | 157.80 (24.05) | 147.43 (15.66) | 0.164 |
| <b>LDL (mg/dL)</b>               | 83.20 (29.22)  | 63.57 (11.37)  | 0.290 |
| <b>Triglyceride (mg/dL)</b>      | 111.80 (43.29) | 113.86 (41.55) | 0.807 |
| <b>HDL (mg/dL)</b>               | 61.80 (21.90)  | 67.86 (12.80)  | 0.744 |
| <b>SPEED</b>                     | 5.14 (5.52)    | 5.50 (5.61)    | 0.907 |
| <b>TBUT (sec)</b>                | 7.43 (7.10)    | 4.62 (1.84)    | 0.874 |
| <b>Corneal stain</b>             | 1.43 (1.81)    | 1.33 (1.22)    | 0.826 |
| <b>Conjunctival stain</b>        | 2.57 (3.60)    | 3.78 (2.91)    | 0.328 |
| <b>MG expressibility</b>         | 3.86 (2.27)    | 2.78 (2.49)    | 0.335 |
| <b>MG quality</b>                | 11.29 (4.39)   | 13.78 (4.15)   | 0.415 |
| <b>TFL thickness(nm)</b>         | 82.67 (24.88)  | 70.25 (27.18)  | 0.543 |
| <b>Meiboscore</b>                |                |                | 0.155 |
| Grade 0 (%)                      | 100.00         | 71.43          |       |
| Grade 1 (%)                      | 0.00           | 28.57          |       |
| Grade 2 (%)                      | 0.00           | 0.00           |       |
| Grade 3 (%)                      | 0.00           | 0.00           |       |

Values are presented as mean (standard deviation) or number (%). LDL Low-density lipoprotein, HDL high-density lipoprotein, SPEED Standard patient evaluation of eye dryness, TUBT tear film break-up time, MG meibomian gland, TFL tear film lipid layer. The bolds stand out for the “statistically significant”.

**Supplementary Table S3.** Comparison of serum lipid profile values and clinical parameters according to total duration of statin use.

| <b>Duration</b>   |                 |                   |                  |  | <i>p-value</i> |
|-------------------|-----------------|-------------------|------------------|--|----------------|
| <b>&lt;5years</b> | <b>5-9years</b> | <b>10-14years</b> | <b>≥ 15years</b> |  |                |
| <b>(n=16)</b>     | <b>(n=8)</b>    | <b>(n=9)</b>      | <b>(n=10)</b>    |  |                |
|                   |                 |                   |                  |  |                |

|                           |                   |                   |                |                |       |
|---------------------------|-------------------|-------------------|----------------|----------------|-------|
| <b>Total cholesterol</b>  | 168.86<br>(27.43) | 166.17<br>(35.10) | 142.22 (34.62) | 148.00 (21.52) | 0.147 |
| <b>LDL (mg/dL)</b>        | 87.86 (29.38)     | 88.83<br>(35.59)  | 68.00 (24.99)  | 70.56 (17.56)  | 0.240 |
| <b>Triglyceride</b>       | 153.07<br>(88.69) | 120.50<br>(40.31) | 179.89 (86.31) | 99.33 (33.35)  | 0.135 |
| <b>HDL (mg/dL)</b>        | 60.00 (16.59)     | 61.50<br>(10.97)  | 53.78 (7.21)   | 65.56 (12.47)  | 0.213 |
| <b>SPEED</b>              | 4.40 (5.18)       | 5.89 (5.04)       | 4.70 (4.14)    | 2.88 (2.90)    | 0.542 |
| <b>TBUT (sec)</b>         | 5.37 (2.47)       | 4.43 (1.80)       | 4.15 (2.14)    | 6.03 (5.94)    | 0.447 |
| <b>Corneal stain</b>      | 1.25 (1.39)       | 1.11 (1.36)       | 1.30 (1.16)    | 1.10 (1.73)    | 0.864 |
| <b>Conjunctival stain</b> | 2.81 (3.41)       | 4.67 (3.57)       | 3.90 (3.07)    | 4.40 (3.86)    | 0.431 |
| <b>MG expressibility</b>  | 3.94 (2.95)       | 4.00 (2.45)       | 4.00 (2.31)    | 2.80 (2.20)    | 0.614 |
| <b>MG quality</b>         | 12.81 (5.36)      | 11.44 (5.27)      | 10.10 (5.11)   | 13.70 (4.83)   | 0.393 |
| <b>TFL thickness(nm)</b>  | 80.25 (18.57)     | 91.89<br>(10.46)  | 92.20 (18.50)  | 80.60 (25.94)  | 0.283 |
| <b>Meiboscore</b>         |                   |                   |                |                | 0.154 |
| Grade 0 (%)               | 81.82             | 100.00            | 50.00          | 87.50          |       |
| Grade 1 (%)               | 9.09              | 0.00              | 30.00          | 12.50          |       |
| Grade 2 (%)               | 0.00              | 0.00              | 20.00          | 0.00           |       |
| Grade 3 (%)               | 9.09              | 0.00              | 0.00           | 0.00           |       |

Values are presented as the mean (standard deviation) or number (%). LDL low-density lipoprotein, HDL high-density lipoprotein, SPEED Standard patient evaluation of eye dryness, TUBT tear film break-up time, MG meibomian gland, TFL tear film lipid layer. The bolds stand out for the “statistically significant”.
